# Supplementary material for: SPT6 promotes epidermal differentiation and blockade of an intestinal-like phenotype through control of transcriptional elongation
Source: PubMed Central journal article supplement (PMC7862286; doi:10.1038/s41467-021-21067-w), 2021-02-04
Supplement: 41467_2021_21067_MOESM1_ESM.pdf [file 41467_2021_21067_MOESM1_ESM.pdf]

### Supplementary Figure 1

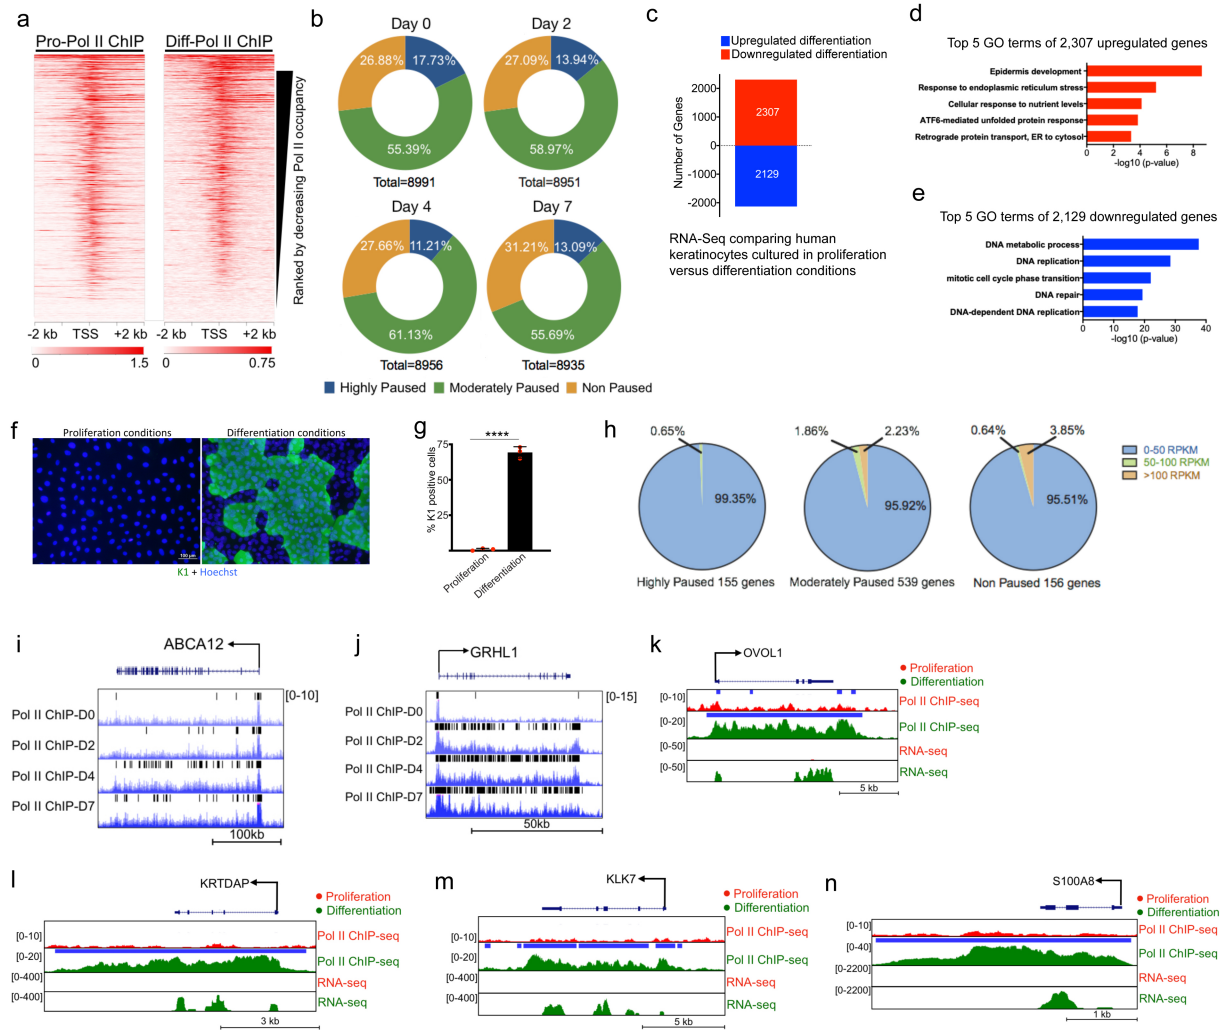

### Supplementary Figure 1. A subset of induced epidermal differentiation genes are paused in proliferative cells and released upon differentiation.

(a) Heatmap of the RNA Pol II ChIP-Seq performed in proliferation (Pro) and differentiation (Diff) conditions. Pol II binding is shown ranked by decreasing Pol II occupancy. X-axis shows genic regions -2kb upstream to +2kb downstream of the transcription start site (TSS). N=3 independent experiments. (b) Donut chart of percentage of genes that are highly paused, moderately paused, non-paused during time-course of epidermal differentiation (days 0, 2, 4, and 7). Genes that contained significant Pol II binding (Pol II ChIP-Seq) during the timecourse were subjected to travel ratio analysis. (c) Bar graph summarizing the differentially expressed genes between proliferation and differentiation conditions. 2,307 genes were significantly upregulated and 2,129 genes were decreased during epidermal differentiation. (d) Gene ontology (GO) terms for the 2,307 genes upregulated during differentiation using hypergeometric distribution. (e) GO terms for the 2,129 genes downregulated during epidermal differentiation using hypergeometric distribution. (f) Immunofluorescent staining of early differentiation marker K1 (green) and Hoechst (blue) staining of nuclei. Primary human keratinocytes were cultured in proliferation conditions or differentiated for 3 days. n=3

independent experiments, scale bar = 100 $\mu$ m. **(g)** Quantitation of the percent of K1 positive cells from images taken in (f). Mean values are shown with error bars=SD. \*\*\*\*  $p < 0.0001$  (two-sided t-test). N=3 independent experiments. At least 100 cells were quantitated per experiment. **(h)** Breakdown of the percentage of highly paused (155 genes), moderately paused (539 genes), and non-paused (156 genes) genes that have RPKM values between 0-50 (blue), 50-100 (green), and greater than 100 (orange). **(i-j)** Gene tracks of two highly paused differentiation genes *ABCA12* (i) and *GRHL1* (j). Pol II ChIP-Seq tracks is shown during the timecourse of epidermal differentiation (D= day 0, day 2, day 4, and day 7 of differentiation). Y-axis shows reads per million and X-axis shows regions along the gene. Black bars over gene tracks show significant binding. **(k)** Gene track of a moderately paused differentiation gene *OVOL1*. Pol II ChIP-Seq tracks and RNA-Seq tracks are shown in proliferation (red) and differentiation (green) conditions. Y-axis shows reads per million and X-axis shows regions along the gene. Blue bars over gene track shows significant binding. **(l-n)** Gene tracks showing differentiation genes that have no RNA Pol II binding in proliferation conditions, but gain it upon differentiation. Pol II ChIP-Seq tracks and RNA-Seq tracks are shown in proliferation (red) and differentiation (green) conditions. Y-axis shows reads per million and X-axis shows regions along the gene. Blue bars over gene tracks show significant binding.

## Supplementary Figure 2

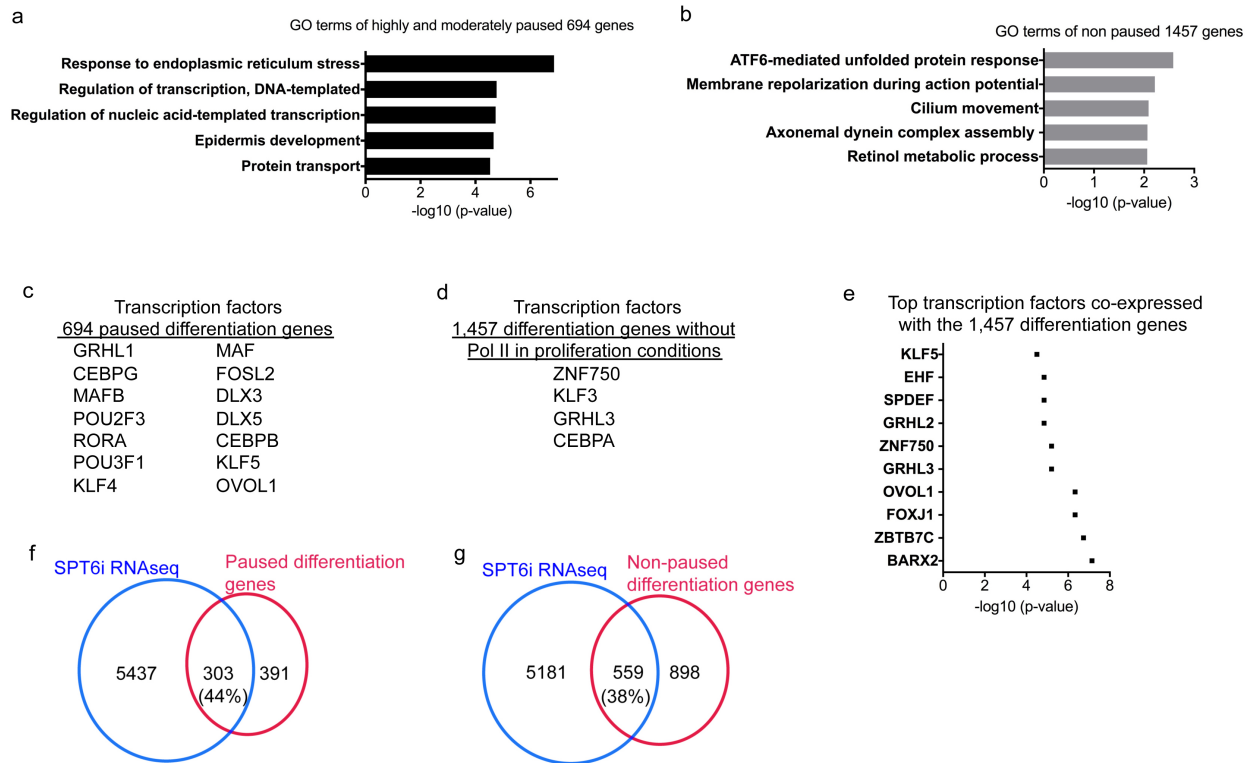

### Supplementary Figure 2. Paused differentiation genes are enriched for transcription factors that may activate the non-paused differentiation genes.

(a) Gene Ontology (GO) terms for the 694 highly and moderately paused differentiation genes using hypergeometric distribution. (b) GO terms for the 1457 non-paused differentiation genes using hypergeometric distribution. (c) Known epidermal differentiation promoting transcription factors found in the 694 highly and moderately paused differentiation gene list. (d) Known epidermal differentiation promoting transcription factors found in the 1457 non-paused differentiation gene list. (e) The top 10 transcription factors co-expressed with the 1,457 non-paused differentiation genes using Enrichr. (f) Overlap of the SPT6 knockdown gene expression signature with the 694 highly and moderately paused differentiation genes. (g) Overlap of the SPT6 knockdown gene expression signature with the 1457 non-paused differentiation genes.

### Supplementary Figure 3

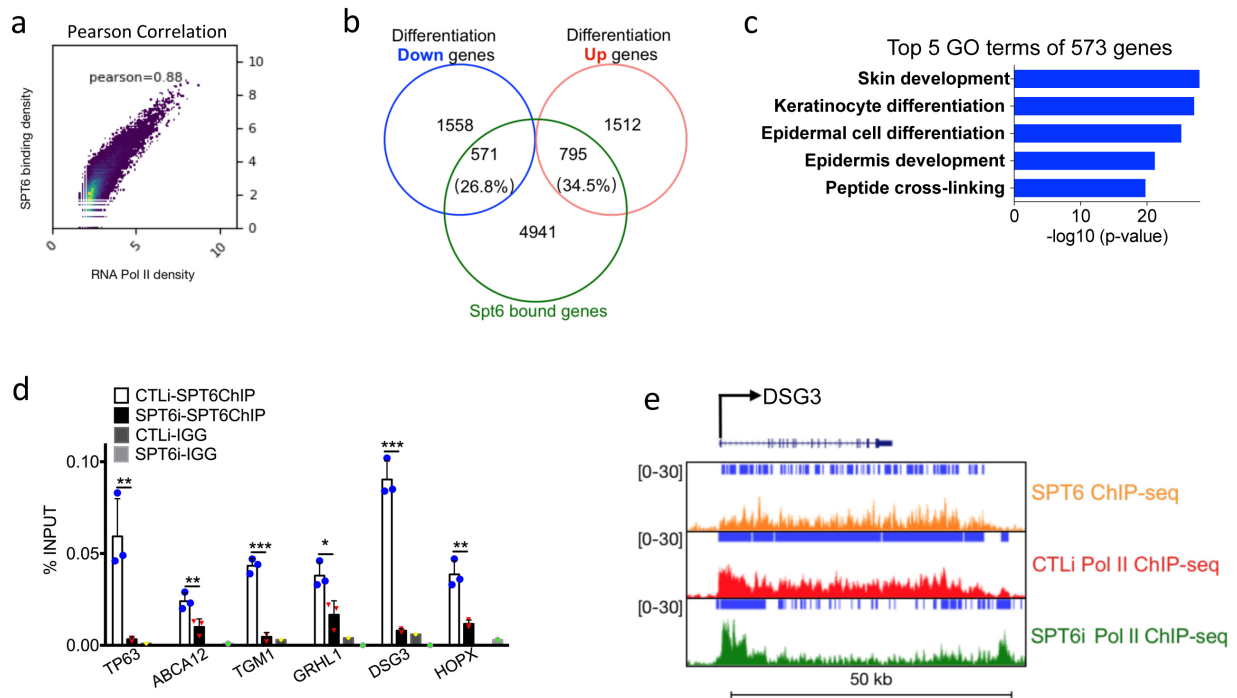

### Supplementary Figure 3. SPT6 binding correlates with RNA Pol II and is necessary to promote transcription elongation.

(a) Pearson correlation between the SPT6 and RNA Pol II ChIP-Seq performed in differentiation conditions. (b) Venn diagram of SPT6 bound genes (SPT6 ChIP-Seq) with genes increased or decreased during epidermal differentiation. (c) Top 5 Gene Ontology (GO) terms for the 573 genes with reduced expression after SPT6 knockdown. These 573 genes are also bound directly by SPT6. (d) ChIP-qPCR of SPT6 pulldown in CTLi and SPT6i keratinocytes (day 3 differentiation). Each pulldown was normalized to its respective input and enrichment shown as a percent of input. IGG pulldowns from CTLi and SPT6i cells were used as a negative control. N=3 independent experiments. Mean values are shown with error bars=SD. \*\*=0.0092 for TP63, \*\*= 0.0186 for ABCA12, \*\*\*= 0.0001 for TGM1, \*=0.0231 for GRHL1, \*\*\*=0.0001 for DSG3, \*\*=0.0036 for HOPX (two-sided t-test). (e) Gene track of differentiation gene *DSG3*. SPT6 ChIP-Seq in differentiation conditions is shown in orange. CTLi (red) and SPT6i (green) RNA Pol II ChIP-Seq in differentiation conditions are also shown. Y-axis shows reads per million and blue bar over gene tracks represent significant peaks.



Supplementary Figure 4

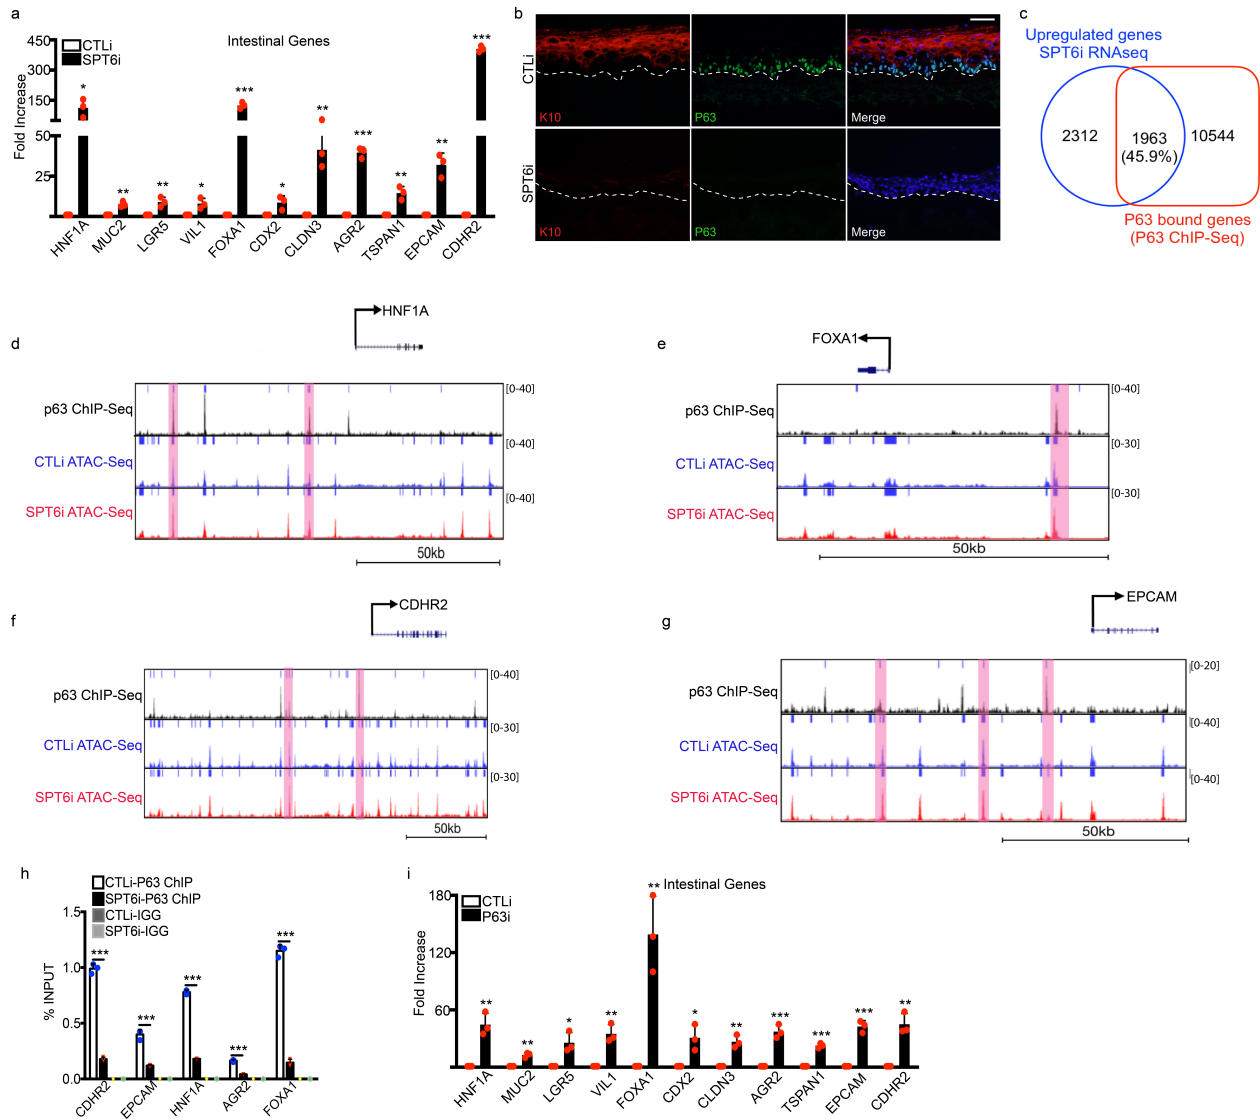

### Supplementary Figure 4. SPT6 is necessary to suppress an intestinal fate through the epidermal master transcription factor, P63

(a) RT-qPCR quantifying the relative mRNA expression levels of intestinal genes in regenerated human epidermis (day 6) in CTLi and SPT6i samples. qPCR values were normalized to *L32*. n=3 independent experiments. \* = 0.0128 for *HNF1A*, \*\* = 0.0027 for *MUC2*, \*\* = 0.0095 for *LGR5*, \* = 0.0197 for *VIL1*, \*\*\* = 0.0001 for *FOXA1*, \* = 0.0332 for *CDX2*, \*\* = 0.0039 for *CLDN3*, \*\*\* = 0.0001 for *AGR2*, \*\* = 0.0045 for *TSPAN1*, \*\* = 0.0017 for *EPCAM*, \*\*\* = 0.0001 for *CDHR2*. (b) Immunofluorescent staining of early differentiation marker K10 (red) and transcription factor P63 (green) in day 6 regenerated human epidermis treated with control (CTLi) or siRNAs targeting SPT6 (SPT6i). Merged image includes Hoechst staining of nuclei. n=3 independent experiments. Scale bar = 60µm. (c) Overlap of the 4,275 genes increased in expression upon SPT6 knockdown with the 12,507 genes that P63 binds (identified by P63 ChIP-Seq). (d-g) Gene tracks showing intestinal genes *HNF1A* (d), *FOXA1* (e), *CDHR2* (f) and *EPCAM* (g). ATAC-Seq signals for CTLi (blue) and SPT6i (red) are shown. P63 ChIP-Seq is shown in black. Regions marked in pink denote P63 bound regions with increased chromatin accessibility upon SPT6 depletion. Y-axis represents reads per million. X-axis denotes regions along the gene. (h) ChIP-

qPCR of P63 pulldown in CTLi and SPT6i keratinocytes (day 3 differentiation). Each pulldown was normalized to its respective input and enrichment shown as a percent of input. IGG pulldowns from CTLi and SPT6i cells were used as a negative control. n=3 independent experiments. (i) RT-qPCR quantifying the relative mRNA expression levels of intestinal genes in regenerated human epidermis (day 6) in CTLi and P63i samples. qPCR values were normalized to *L32*. n=3 independent experiments. \*\*=0.0032 for HNF1A, \*\*=0.0011 for MUC2, \*=0.0167 for LGR5, \*\*= 0.0036 for VIL1, \*\*= 0.0040 for FOXA1, \*= 0.0194 for CDX2, \*\*=0.0026 for CLDN3, \*\*\*=0.0009 for AGR2, \*\*\*= 0.0001 for TSPAN1, \*\*\*=0.0003 for EPCAM, \*\*= 0.0025 for CDHR2. All bar graphs show mean values with error bars=SD. \**p* <0.05, \*\* *p* <0.01, \*\*\* *p* <0.001 (two-sided t-test for 4a,h-i).
